# Supplementary material for: Composition fluctuation intensity effect on the stability of polymer films
Source: Royal Society of Chemistry journal article supplement (doi:10.1039/c6ra12723a), 2016-01-01
Supplement: c6ra12723a1.pdf [file c6ra12723a1.pdf]

# Composition Fluctuation Intensity Effect on the Stability in Polymer Films

Yu Zhu, Qiucheng Yang, Yongjin Li\*, Jichun You\*

College of Material, Chemistry and Chemical Engineering, Hangzhou Normal University, No. 16

Xuelin Rd., Xiasha High-tech Zone, Hangzhou 310036, P. R. China.

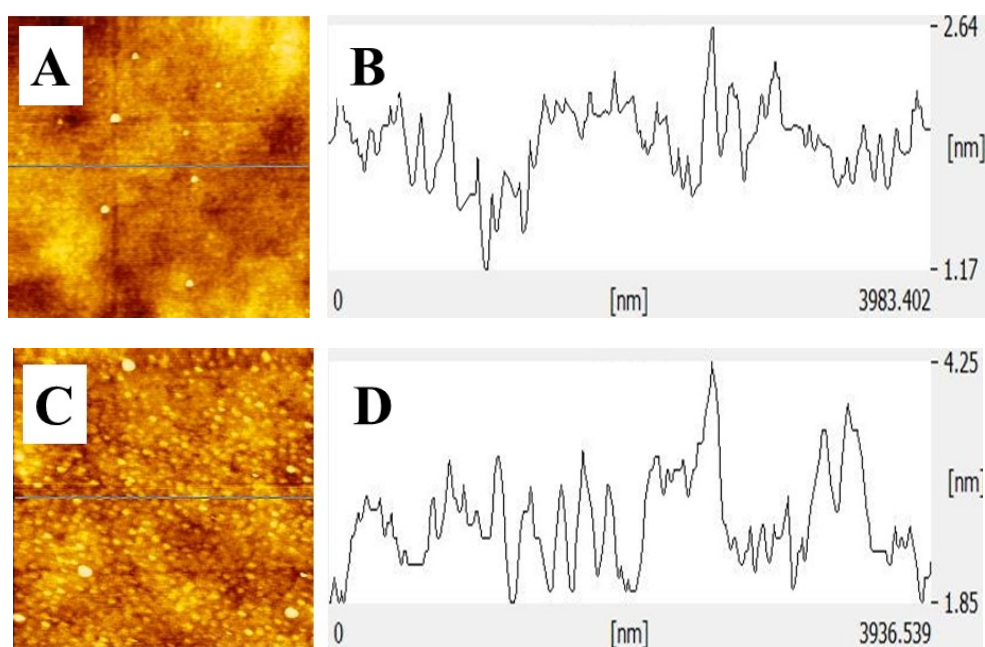

Figure S1, AFM topography images (A and C, corresponding to Figure 2A4 and Figure 2B4, respectively) and line-cut profiles of them (B and D).

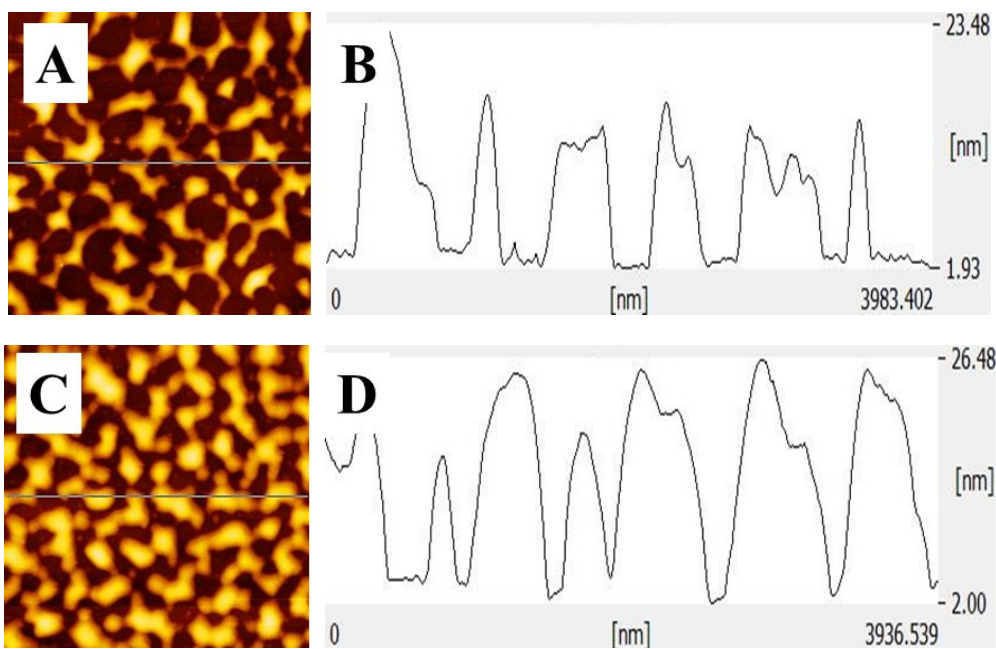

Figure S2, AFM topography images (A and C, corresponding to Figure 3A4 and Figure 3B4, respectively) and line-cut profiles of them (B and D).

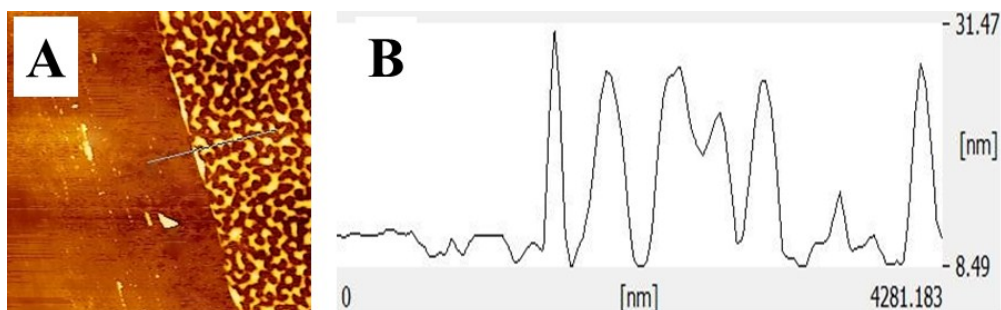

Figure S3, AFM topography image (A) of the scratched specimen and line-cut profile of the indicated position (B). The heights of the scratched and un-scratched area are nearly equal, suggesting that the substrate has been exposed to air.

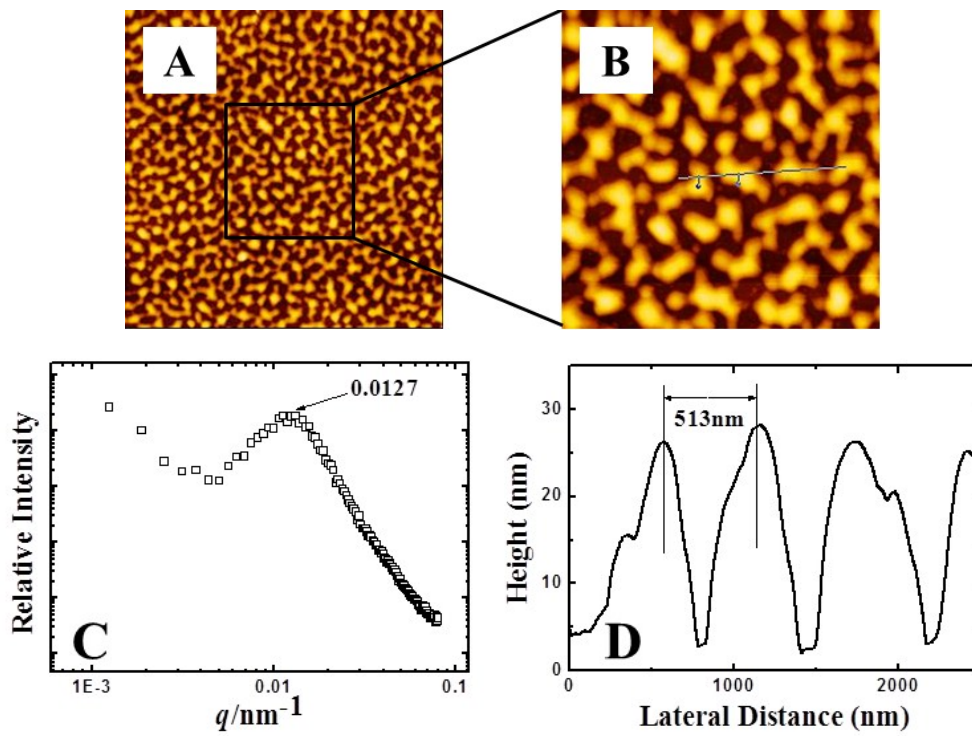

Figure s4, Topography images for SAN98 at 145°C for 12h, (A)  $10 \times 10 \mu\text{m}^2$ , (B)  $4 \times 4 \mu\text{m}^2$ , (C) Fast Fourier transition (FFT) of image fig.s4(A), (D) The line-cut profiles on image fig.s4(B) on the indicated position.
